# Supplementary material for: The origin of off-resonance non-linear optical activity of a gold chiral nanomaterial
Source: Royal Society of Chemistry journal article supplement (doi:10.1039/c3nr04746f), 2013-01-01
Supplement: c3nr04746f.pdf [file c3nr04746f.pdf]

Supplementary Information

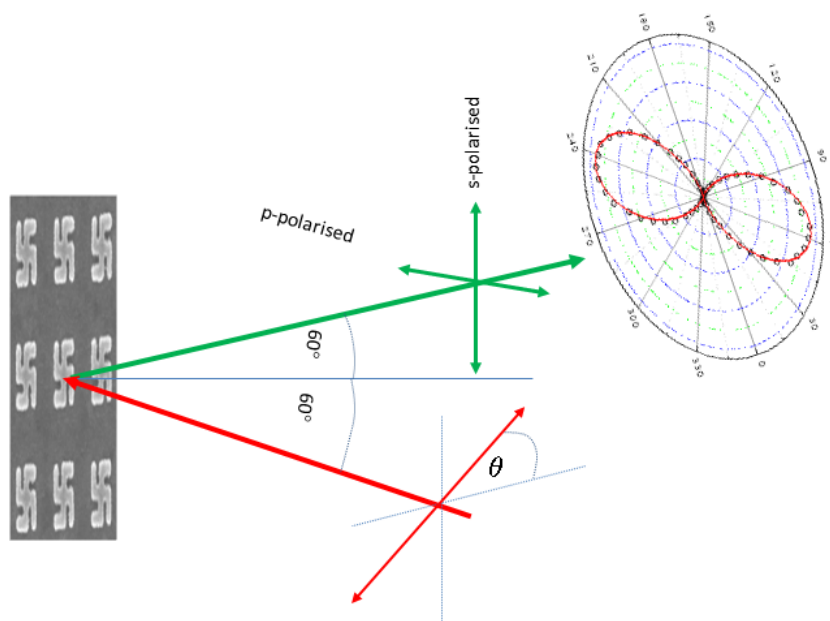

Figure S1. A schematic diagram illustrating the experimental geometry

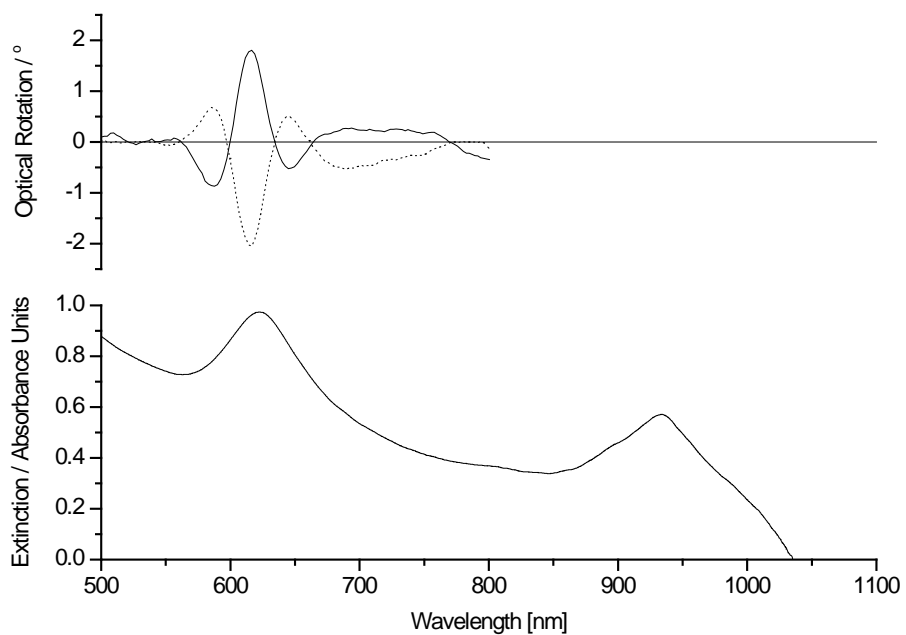

Figure S2 Upper panel, optical rotatory dispersion spectra of left- (dotted) and right- (solid) handed substrates. Lower panel, extinction spectra of left-handed substrate. Spectra were collected in reflection using light which was unpolarised.

Table S1. Selection Rules for coefficients in equation 9.

| Coefficient     | Chirally sensitive | Zero for achiral substrates |
|-----------------|--------------------|-----------------------------|
| $\alpha_p$      | NO                 | NO                          |
| $\beta_p$       | YES                | NO                          |
| $\gamma_p$      | NO                 | NO                          |
| $\delta_p$      | YES                | YES                         |
| $\varepsilon_p$ | YES                | YES                         |
| $\alpha_s$      | YES                | YES                         |
| $\beta_s$       | YES                | NO                          |
| $\gamma_s$      | YES                | YES                         |
| $\delta_s$      | YES                | YES                         |
| $\varepsilon_s$ | YES                | YES                         |
